# Supplementary material for: Development and Implementation of a Quadruple RT-qPCR Method for the Identification of Porcine Reproductive and Respiratory Syndrome Virus Strains
Source: MDPI journal article supplement (doi:10.3390/v15091946), 2023-09-18
Supplement: s1 [file s1]

## Supplementary Materials

**Table S1. Optimal annealing temperature for single-plex quantitative fluorescence**

| Annealing temperature (°C) | FAM          | ROX          | HEX          | CY5          |
|----------------------------|--------------|--------------|--------------|--------------|
| 60                         | 25.33 ± 1.32 | 27.75 ± 0.67 | 23.80 ± 0.73 | 20.47 ± 0.66 |
| 59                         | 24.16 ± 0.53 | 27.59 ± 0.22 | 23.71 ± 1.42 | 19.72 ± 1.73 |
| 58                         | 24.82 ± 0.20 | 26.07 ± 0.31 | 23.28 ± 0.91 | 20.19 ± 1.05 |
| 57                         | 24.16 ± 1.14 | 25.27 ± 1.58 | 23.13 ± 0.47 | 19.84 ± 1.52 |
| 56                         | 25.16 ± 1.02 | 26.63 ± 1.40 | 22.72 ± 1.84 | 20.24 ± 2.04 |
| 55                         | 24.32 ± 2.17 | 26.7 ± 2.28  | 23.05 ± 0.46 | 20.01 ± 2.55 |
| 54                         | 24.45 ± 0.46 | 26.58 ± 1.12 | 23.04 ± 0.37 | 20.06 ± 1.20 |
| 53                         | 24.5 ± 1.19  | 27.87 ± 0.69 | 22.86 ± 1.75 | 20.77 ± 0.92 |

**Table S2. Optimal annealing temperature for the four virus plasmids was determined to be 59 °C**

| Annealing temperature (°C) | FAM          | ROX          | HEX          | CY5          |
|----------------------------|--------------|--------------|--------------|--------------|
| 60                         | 22.67 ± 1.72 | 24.49 ± 0.96 | 24.64 ± 1.56 | 24.33 ± 1.97 |
| 59                         | 20.67 ± 1.38 | 23.73 ± 0.68 | 22.81 ± 1.27 | 22.85 ± 1.22 |
| 58                         | 22.54 ± 0.82 | 24.13 ± 1.34 | 24.08 ± 1.04 | 23.78 ± 0.87 |
| 57                         | 20.77 ± 2.41 | 23.81 ± 1.72 | 23.14 ± 0.98 | 22.93 ± 1.62 |
| 56                         | 21.77 ± 1.88 | 23.92 ± 0.82 | 23.79 ± 1.62 | 23.54 ± 1.86 |
| 55                         | 21.84 ± 2.07 | 23.93 ± 1.57 | 22.94 ± 1.59 | 23.46 ± 1.62 |
| 54                         | 21.65 ± 1.36 | 23.5 ± 1.65  | 23.23 ± 2.42 | 22.99 ± 0.96 |
| 53                         | 21.75 ± 1.81 | 24.1 ± 1.02  | 23.78 ± 1.68 | 23.25 ± 1.93 |

**Table S3. Amplification results from concentration crossover experiment of primers and probes for PRRSV1-ORF7 viral plasmid**

| FAM (CT $\bar{x} \pm SD$ ) |     | Probes (μmol/L) |              |              |              |              |              |
|----------------------------|-----|-----------------|--------------|--------------|--------------|--------------|--------------|
|                            |     | 0.2             | 0.3          | 0.4          | 0.5          | 0.6          | 0.7          |
| Primers (μmol/L)           | 0.2 | 21.14 ± 0.90    | 20.51 ± 1.56 | 20.3 ± 2.35  | 20.74 ± 2.33 | 20.86 ± 0.73 | 20.74 ± 1.57 |
|                            | 0.3 | 20.82 ± 1.67    | 20.72 ± 0.89 | 20.72 ± 1.67 | 20.33 ± 0.63 | 20.39 ± 1.25 | 20.37 ± 2.04 |
|                            | 0.4 | 20.84 ± 2.23    | 20.08 ± 1.59 | 20.64 ± 1.72 | 20.17 ± 1.55 | 20.74 ± 1.20 | 20.4 ± 1.35  |
|                            | 0.5 | 21.06 ± 1.82    | 20.9 ± 1.68  | 20.85 ± 1.46 | 20.87 ± 0.86 | 20.39 ± 1.39 | 20.76 ± 1.94 |
|                            | 0.6 | 21.16 ± 1.16    | 20.91 ± 2.46 | 20.15 ± 0.97 | 20.76 ± 1.54 | 20.62 ± 1.04 | 20.42 ± 2.26 |
|                            | 0.7 | 21.94 ± 0.68    | 20.42 ± 1.59 | 21.0 ± 1.45  | 20.71 ± 2.42 | 20.65 ± 1.65 | 20.37 ± 1.89 |

**Table S4. Amplification results from concentration crossover experiment of primers and probes for PRRSV2-ORF7 viral plasmid**

| ROX (CT $\bar{x} \pm SD$ ) |     | Probes (μmol/L) |              |              |              |              |              |
|----------------------------|-----|-----------------|--------------|--------------|--------------|--------------|--------------|
|                            |     | 0.2             | 0.3          | 0.4          | 0.5          | 0.6          | 0.7          |
| Primers (μmol/L)           | 0.2 | 19.66 ± 1.73    | 19.23 ± 1.11 | 18.51 ± 1.08 | 18.35 ± 1.68 | 18.37 ± 1.95 | 18.34 ± 1.68 |
|                            | 0.3 | 19.7 ± 1.87     | 19.45 ± 1.65 | 18.98 ± 1.53 | 18.6 ± 1.05  | 18.37 ± 1.84 | 18.46 ± 1.79 |
|                            | 0.4 | 19.77 ± 1.25    | 18.13 ± 1.86 | 18.41 ± 1.37 | 18.5 ± 1.64  | 18.53 ± 1.73 | 18.23 ± 1.18 |

|     |              |              |              |              |              |              |
|-----|--------------|--------------|--------------|--------------|--------------|--------------|
| 0.5 | 20.03 ± 1.26 | 19.47 ± 1.23 | 19.18 ± 1.49 | 18.84 ± 1.80 | 18.52 ± 1.37 | 18.57 ± 1.30 |
| 0.6 | 19.97 ± 1.80 | 19.69 ± 1.87 | 19.34 ± 1.80 | 18.95 ± 1.63 | 18.73 ± 1.08 | 18.81 ± 1.03 |
| 0.7 | 21.12 ± 1.34 | 19.43 ± 1.39 | 19.35 ± 1.24 | 18.97 ± 1.43 | 18.77 ± 1.35 | 18.55 ± 1.64 |

**Table S5. Amplification results from concentration crossover experiment of primers and probes for HP-PRRSV2-NSP2 viral plasmid**

| HEX (CT $\bar{x} \pm SD$ )       |     | Probes ( $\mu\text{mol/L}$ ) |              |              |              |              |              |
|----------------------------------|-----|------------------------------|--------------|--------------|--------------|--------------|--------------|
|                                  |     | 0.2                          | 0.3          | 0.4          | 0.5          | 0.6          | 0.7          |
| Primers<br>( $\mu\text{mol/L}$ ) | 0.2 | 24.3 ± 1.46                  | 24.12 ± 0.75 | 25.34 ± 0.87 | 25.27 ± 1.53 | 25.5 ± 1.32  | 25.15 ± 1.26 |
|                                  | 0.3 | 24.27 ± 2.08                 | 24.13 ± 2.34 | 25.14 ± 2.26 | 25.14 ± 0.24 | 25.4 ± 2.12  | 24.99 ± 0.79 |
|                                  | 0.4 | 24.52 ± 0.98                 | 24.02 ± 1.18 | 25.16 ± 2.06 | 25.38 ± 0.89 | 25.69 ± 2.40 | 25.26 ± 1.14 |
|                                  | 0.5 | 24.55 ± 1.61                 | 24.25 ± 1.34 | 25.24 ± 2.05 | 25.15 ± 1.42 | 24.78 ± 1.84 | 25.39 ± 1.48 |
|                                  | 0.6 | 24.47 ± 0.27                 | 24.07 ± 0.79 | 25.16 ± 0.42 | 25.53 ± 1.86 | 25.1 ± 1.62  | 25.41 ± 0.73 |
|                                  | 0.7 | 24.03 ± 0.84                 | 24.98 ± 1.54 | 25.07 ± 1.35 | 24.79 ± 1.23 | 25.17 ± 0.98 | 24.14 ± 1.43 |

**Table S6. Amplification results from concentration crossover experiment of primers and probes for C-PRRSV2-NSP2 viral plasmid**

| CY5 (CT $\bar{x} \pm SD$ )       |     | Probes ( $\mu\text{mol/L}$ ) |              |              |              |              |              |
|----------------------------------|-----|------------------------------|--------------|--------------|--------------|--------------|--------------|
|                                  |     | 0.2                          | 0.3          | 0.4          | 0.5          | 0.6          | 0.7          |
| Primers<br>( $\mu\text{mol/L}$ ) | 0.2 | 29.36 ± 0.84                 | 30.22 ± 2.04 | 30.09 ± 1.97 | 30.03 ± 0.76 | 29.94 ± 0.79 | 29.67 ± 2.36 |
|                                  | 0.3 | 29.7 ± 1.51                  | 29.77 ± 1.63 | 29.99 ± 2.06 | 30.01 ± 0.83 | 30.04 ± 1.83 | 29.5 ± 2.44  |
|                                  | 0.4 | 29.81 ± 1.66                 | 29.04 ± 1.67 | 29.97 ± 2.24 | 29.4 ± 2.56  | 29.94 ± 2.36 | 29.56 ± 1.66 |
|                                  | 0.5 | 30.01 ± 0.95                 | 29.96 ± 2.27 | 29.87 ± 1.65 | 29.05 ± 1.23 | 29.5 ± 1.73  | 29.94 ± 1.58 |
|                                  | 0.6 | 29.64 ± 2.25                 | 30.07 ± 0.93 | 29.81 ± 2.35 | 29.68 ± 1.53 | 29.8 ± 0.90  | 29.65 ± 2.08 |
|                                  | 0.7 | 29.95 ± 1.68                 | 29.83 ± 1.25 | 29.67 ± 1.52 | 29.35 ± 2.24 | 29.6 ± 1.82  | 29.24 ± 1.85 |

**Table S7. Comparison of Ct values between the national reference method and RT-qPCR methods**

| Number | RT-qPCR (CT) |     |     |       | National reference method (CT) |     |
|--------|--------------|-----|-----|-------|--------------------------------|-----|
|        | FAM          | ROX | HEX | CY5   | FAM                            | HEX |
| 1      | 25           | N   | N   | N     | 25.01                          | N   |
| 2      | 27.35        | N   | N   | N     | 24.46                          | N   |
| 3      | N            | N   | N   | N     | N                              | N   |
| 4      | 20.8         | N   | N   | N     | 20.74                          | N   |
| 5      | N            | N   | N   | N     | N                              | N   |
| 6      | 27.99        | N   | N   | N     | 25.66                          | N   |
| 7      | N            | N   | N   | N     | N                              | N   |
| 8      | N            | N   | N   | N     | N                              | N   |
| 9      | N            | N   | N   | N     | N                              | N   |
| 10     | N            | N   | N   | N     | N                              | N   |
| 11     | N            | N   | N   | N     | N                              | N   |
| 12     | 17.53        | N   | N   | N     | 19.31                          | N   |
| 13     | 16.58        | N   | N   | 17.86 | 18.5                           | N   |
| 14     | N            | N   | N   | N     | N                              | N   |
| 15     | N            | N   | N   | N     | N                              | N   |
| 16     | N            | N   | N   | N     | N                              | N   |
| 17     | 24.78        | N   | N   | N     | 27.15                          | N   |

---

|    |       |   |       |       |       |       |
|----|-------|---|-------|-------|-------|-------|
| 18 | 18.56 | N | N     | N     | 19.89 | N     |
| 19 | 23.41 | N | N     | N     | 23.55 | N     |
| 20 | 22.36 | N | N     | N     | 24.17 | N     |
| 21 | 16.07 | N | N     | N     | 17.07 | N     |
| 22 | 17.05 | N | N     | N     | 17.89 | N     |
| 23 | 21.95 | N | N     | N     | 22.43 | N     |
| 24 | 26.31 | N | N     | N     | 26.48 | N     |
| 25 | 34.21 | N | N     | N     | 32.34 | N     |
| 26 | N     | N | N     | N     | N     | N     |
| 27 | N     | N | N     | N     | N     | N     |
| 28 | N     | N | N     | N     | N     | N     |
| 29 | 27.1  | N | N     | 27.33 | 28.31 | N     |
| 30 | 35.25 | N | 37.67 | N     | 37.45 | 38.98 |
| 31 | N     | N | N     | N     | N     | N     |
| 32 | N     | N | N     | N     | N     | N     |
| 33 | N     | N | N     | N     | N     | N     |
| 34 | N     | N | N     | N     | N     | N     |
| 35 | N     | N | N     | N     | 31.15 | N     |
| 36 | 26.47 | N | N     | N     | 27.73 | N     |
| 37 | 29.88 | N | N     | N     | 28.99 | N     |
| 38 | N     | N | N     | N     | N     | N     |
| 39 | 18.53 | N | 21.92 | N     | 20.21 | 22.03 |
| 40 | N     | N | N     | N     | N     | N     |
| 41 | N     | N | N     | N     | N     | N     |
| 42 | N     | N | N     | N     | N     | N     |
| 43 | N     | N | N     | N     | N     | N     |
| 44 | N     | N | N     | N     | N     | N     |
| 45 | 27.87 | N | N     | N     | N     | N     |
| 46 | N     | N | N     | N     | N     | N     |
| 47 | N     | N | N     | N     | N     | N     |
| 48 | N     | N | N     | N     | N     | N     |
| 49 | N     | N | N     | N     | N     | N     |
| 50 | N     | N | N     | N     | N     | N     |
| 51 | N     | N | N     | N     | N     | N     |
| 52 | N     | N | N     | N     | N     | N     |
| 53 | N     | N | N     | N     | N     | N     |
| 54 | N     | N | N     | N     | N     | N     |
| 55 | N     | N | N     | N     | N     | N     |
| 56 | N     | N | N     | N     | N     | N     |
| 57 | N     | N | N     | N     | N     | N     |
| 58 | N     | N | N     | N     | N     | N     |
| 59 | N     | N | N     | N     | N     | N     |
| 60 | N     | N | N     | N     | N     | N     |
| 61 | N     | N | N     | N     | N     | N     |
| 62 | N     | N | N     | N     | N     | N     |
| 63 | N     | N | N     | N     | N     | N     |
| 64 | N     | N | N     | N     | N     | N     |
| 65 | N     | N | N     | N     | N     | N     |
| 66 | N     | N | N     | N     | N     | N     |
| 67 | N     | N | N     | N     | N     | N     |
| 68 | N     | N | N     | N     | 33.46 | N     |

---

|                  |       |   |       |   |       |       |
|------------------|-------|---|-------|---|-------|-------|
| 69               | N     | N | N     | N | N     | N     |
| 70               | N     | N | N     | N | N     | N     |
| 71               | N     | N | N     | N | N     | N     |
| 72               | N     | N | N     | N | N     | N     |
| 73               | N     | N | N     | N | N     | N     |
| 74               | N     | N | N     | N | N     | N     |
| 75               | N     | N | N     | N | N     | N     |
| 76               | N     | N | N     | N | N     | N     |
| 77               | N     | N | N     | N | N     | N     |
| 78               | N     | N | N     | N | N     | N     |
| 79               | N     | N | N     | N | N     | N     |
| 80               | N     | N | N     | N | N     | N     |
| 81               | N     | N | N     | N | N     | N     |
| 82               | N     | N | N     | N | N     | N     |
| 83               | N     | N | N     | N | N     | N     |
| 84               | N     | N | N     | N | N     | N     |
| 85               | N     | N | N     | N | N     | N     |
| 86               | N     | N | N     | N | N     | N     |
| 87               | N     | N | N     | N | N     | N     |
| 88               | N     | N | N     | N | N     | N     |
| 89               | N     | N | N     | N | N     | N     |
| 90               | N     | N | N     | N | N     | N     |
| 91               | N     | N | N     | N | N     | N     |
| 92               | N     | N | N     | N | N     | N     |
| 93               | N     | N | N     | N | N     | N     |
| 94               | 27.54 | N | N     | N | 29.68 | N     |
| 95               | 31.79 | N | N     | N | 32.03 | N     |
| 96               | N     | N | N     | N | N     | N     |
| 97               | N     | N | N     | N | N     | N     |
| 98               | 27.03 | N | 31.6  | N | 27.19 | 30.23 |
| 99               | 27.22 | N | 31.35 | N | 27.44 | 29.56 |
| 100              | 24.09 | N | 28.16 | N | 25.34 | 27.65 |
| Positive control | 25.45 | N | 26.01 | N | 25.73 | 26.65 |
| Negative control | N     | N | N     | N | N     | N     |

---
